# Supplementary material for: Conserved and Noncanonical Activities of Two Histone H3K36 Methyltransferases Required for Insect-Pathogenic Lifestyle of Beauveria bassiana
Source: MDPI journal article supplement (doi:10.3390/jof7110956), 2021-11-11
Supplement: s1 [file s1]

## Supplementary Material

# Conserved and Noncanonical Activities of Two Histone H3K36 Methyltransferases Required for Insect-Pathogenic Lifestyle of *Beauveria bassiana*

Kang Ren, Ya-Ni Mou, Sheng-Hua Ying and Ming-Guang Feng \*

MOE Laboratory of Biosystems Homeostasis & Protection, College of Life Sciences, Zhejiang University, Hangzhou 310058, China; 11807120@zju.edu.cn (K.R.); 11907036@zju.edu.cn (Y.-N.M.); yingsh@zju.edu.cn (S.-H.Y.)

\* Correspondence: mgfeng@zju.edu.cn

**Table S1.** Paired primers used for targeted gene manipulation of *set2* and *ash1* in *B. bassiana*.

| Primers    | Paired sequences (5'–3') <sup>a</sup>                                                                 | Purpose <sup>b</sup>                                          |
|------------|-------------------------------------------------------------------------------------------------------|---------------------------------------------------------------|
| Set2-F/R   | CAATCACAACACCTTCAAAATGAAGGATGACGAGAACGCGACGGTCGAG / CTCGCCC TTGCTCACCATGTGACTCAGAACCTCCTGTTTTCGATTCTG | Cloning <i>set2</i> cDNA (2700 bp) for fusion to <i>gfp</i>   |
| Ash1-F/R   | CAATCACAACACCTTCAAAATGTTGCCACTCCTTCTCGAACCAGTCG / CTCGCCCTT GCTCACCATGTGCTCCACCAATTTATTGTGGGCTTGG     | Cloning <i>ash1</i> cDNA (2475 bp) for fusion to <i>gfp</i>   |
| upSet2-F/R | ACGAGCTGTACAAGTAACCCGGGGCATCTCAAGCAAAAAGGG / TGGCTGCAGGTCG ACGGATCCCAGAGGAGGCTCGCAACAC                | Cloning 3' <i>set2</i> (1420 bp) for targeted gene disruption |
| dnSet2-F/R | GACCCATGGCTCGAGTCTAGATTCTGACTGTCTCTATGGCTCC / GGTGGTGGTGCTA GCGTTAACGTCGCTCTGCTGAATACGGT              | Cloning 5' <i>set2</i> (1005 bp) for targeted gene disruption |
| flSet2-F/R | ATCCGTCGACCTGCAGCCAAGCTTCCCCATTCTGTTCTCCAT / ACACTAGTCAGATCT TCTAGTGTAGCATACACGGGCGTTTTT              | Cloning full-length <i>set2</i> (6645 bp) for complementation |
| upAsh1-F/R | ACGAGCTGTACAAGTAACCCGGGAGATGGTCGGCTTGATGAGG / TGGCTGCAGGTCG ACGGATCCGAGAGGAGGCTAGAAATGA               | Cloning 3' <i>ash1</i> (1278 bp) for targeted gene disruption |
| dnAsh1-F/R | GACCCATGGCTCGAGTCTAGACGCTAATGGCGATGATGT / GGTGGTGGTGCTAGC GTTAACACGGTCCGATGTCTTGATA                   | Cloning 5' <i>ash1</i> (1119 bp) for targeted gene disruption |
| flAsh1-F/R | ATCCGTCGACCTGCAGCCAAGCTTCCGAAGATTGAATAATGTGAAG / ACACTAGTCAG ATCTTCTAGTGTGCGCCAGATAGCAAGAAA           | Cloning full-length <i>ash1</i> (5563 bp) for complementation |
| pSet2-F/R  | CGCATCGTCAATCCAGTCT / AAATCGTTGGCGGCTAAATC                                                            | PCR detecting <i>set2</i>                                     |
| pAsh1-F/R  | CTCACCAACGCAACT / CGCCCACTACCACCAG                                                                    | PCR detecting <i>ash1</i>                                     |
| qSet2-F/R  | GAGATCCCGTCGACAGAG / CCTCAGAGGTCATATCGGGG                                                             | qPCR detecting <i>set2</i>                                    |
| qAsh1-F/R  | TTGCCACTCCTTCTCGAACC / GCTCAGATGGCAGTTCACTG                                                           | qPCR detecting <i>ash1</i>                                    |

<sup>a</sup> Underlined regions denote introduced the cleavage sites of two pairs of restriction enzymes (*Xma*I/*Bam*HI and *Xba*I/*Hpa*I) for targeted gene disruption through homologous recombination of the bar-separated 5' and 3' fragments of *set2* or *ash1* and the recognition fragments for gateway exchange to construct the complementation vector.

<sup>b</sup> PCR detection aimed at the fragments of 1508 bp for deleted *set1* and 1049 bp for WT and of 1289 bp for deleted *ash1* and 937 bp for WT.

**Table S2.** Antibodies used for western blotting of histone H3 and mono-, di- and trimethylated H3 lysines.

| Name of antibody product                            | No. catalog | Manufacturer* | Purpose         |
|-----------------------------------------------------|-------------|---------------|-----------------|
| Histone H3 (D1H2) XP Rabbit mAb                     | 4499S       | CST           | Anti-histone H3 |
| Mono-Methyl-Histone H3 (Lys4) (D1A9) XP Rabbit mAb  | 5326T       | CST           | Anti-H3K4me1    |
| Di-Methyl-Histone H3 (Lys4) (C64G9) Rabbit mAb      | 9725T       | CST           | Anti-H3K4me2    |
| Tri-Methyl-Histone H3 (Lys4) (C42D8) Rabbit mAb     | 9751S       | CST           | Anti-H3K4me3    |
| Mono-Methyl-Histone H3 (Lys9) Rabbit Polyclonal     | 39887       | Active Motif  | Anti-H3K9me1    |
| Di-Methyl-Histone H3 (Lys9) (D85B4) XP Rabbit mAb   | 4658T       | CST           | Anti-H3K9me2    |
| Tri-Methyl-Histone H3 (Lys9) (D4W1U) Rabbit mAb     | 13969S      | CST           | Anti-H3K9me3    |
| Anti-Histone H3 (mono methyl K36) Rabbit Polyclonal | ab9048      | Abcam         | Anti-H3K36me1   |
| Di-Methyl-Histone H3 (Lys36) (C75H12) Rabbit mAb    | 2901T       | CST           | Anti-H3K36me2   |
| Tri-Methyl-Histone H3 (Lys36) (D5A7) XP Rabbit mAb  | 4909S       | CST           | Anti-H3K36me3   |

\* CST, Cell Signaling Technology (Boston, MA, USA); Active Motif (Shanghai, China); Abcam (Shanghai, China).

**Table S3.** Paired primers used for transcriptional profiling of phenotype-related genes in *B. bassiana*.

| Gene                                                                  | Tag locus* | Annotation                                  | Sequences (5'–3') of paired primers              |
|-----------------------------------------------------------------------|------------|---------------------------------------------|--------------------------------------------------|
| <b>Used as reference gene</b>                                         |            |                                             |                                                  |
| <i>GADPH</i>                                                          | BBA_05480  | Glyceraldehyde-3-phosphate dehydrogenase    | TCGAGTCCACTGGTGTCTTC / CCCTCAACAATGCCGAAGCTT     |
| <b>Involved in nutritional uptake, conidiation and hydrophobicity</b> |            |                                             |                                                  |
| <i>cre1</i>                                                           | BBA_05136  | Carbon catabolite repressor                 | TCGAGCACCAGACAAGACAC / CTTGTTACCACGGCGAGAGT      |
| <i>brlA</i>                                                           | BBA_07544  | Developmental activator BrlA                | GATGGATGACAAGTGCGATG / AAAGTCGACGAGAAACGAT       |
| <i>abaA</i>                                                           | BBA_00300  | Developmental activator AbaA                | GCAAGTCTCCAGCCATAT / CTCCTCTTCGTCATAGTAGTC       |
| <i>wetA</i>                                                           | BBA_06126  | Developmental activator WetA                | ATGCGGTACTACAGCCAAGG / GAGTTCCTGCTGGCTACTGG      |
| <i>vosA</i>                                                           | BBA_01023  | Developmental activator VosA                | ACTCATGGGCTCATTGGTGG / CCGGCAAGAGAGATCCGAAA      |
| <i>hyd1</i>                                                           | BBA_03015  | Class I hydrophobin Hyd1                    | ATGGTGAAAGGATCTGCAC / TGGGAAAGAAGACCATCAGC       |
| <i>hyd2</i>                                                           | BBA_06599  | Class II hydrophobin Hyd2                   | TGTCAAGACTGGCGACATTT / ATGGGACAAGCTGGTTGAG       |
| <i>hyd3</i>                                                           | BBA_00530  | Hydrophobin-like protein Hyd3               | CTGGCCACCCTACTTCTGTC / TCTGGCTAGGGGTAGAGCAA      |
| <i>hyd4</i>                                                           | BBA_03071  | Hydrophobin-like protein Hyd4               | AGTGCTGTGCCACTGACATC / GGGGTCATGCAAAAGAGACT      |
| <i>hyd5</i>                                                           | BBA_02999  | Hydrophobin-like protein Hyd5               | GAGGCTCGCACTGATAAAGC / CAACCTTGGCAAAATTTCC       |
| <b>Involved in antioxidant activity</b>                               |            |                                             |                                                  |
| <i>cat1</i>                                                           | BBA_06186  | Spore-specific catalase CatA                | CAACAACATCCCGTCTTCT / ACACCAAATCCCTGCATCAT       |
| <i>cat2</i>                                                           | BBA_05603  | Secreted catalase CatB                      | CTCGTACTTGACACGCAGA / TTGTTGAGGGTGTGGTGTA        |
| <i>cat3</i>                                                           | BBA_09109  | Cytoplasmic catalase CatC                   | CGCACAAGAGAACCTTCACA / AATGGTTTGTGTGCTGCTGA      |
| <i>cat4</i>                                                           | BBA_09760  | Secreted peroxidase/catalase CatD           | TCTGTGCTGGGCTGATCT / CTTGCTGGGACAACTCAT          |
| <i>cat5</i>                                                           | BBA_09338  | Peroxisomal catalase CatP                   | CAAGGATTCTTCTGGCAAGC / AGCAATGAGAGCAACGGTCT      |
| <i>cat6</i>                                                           | BBA_06567  | Catalase-like protein, heme-dependent       | TTCCGCTGAGGACATTCACA / AGGACTTTTCGTCCTCATCT      |
| <i>sod1</i>                                                           | BBA_02311  | Cytosolic Cu/ZnSOD                          | GCGGCTTCCACATCCACCTTTG / GGTCCAGCGTTGCCAGTCTTGAG |
| <i>sod2</i>                                                           | BBA_09706  | Cytosolic MnSOD                             | CCAGTGTTGGCATTGACATG / TCAGCCGCTTCCAGTTGATG      |
| <i>sod3</i>                                                           | BBA_09382  | Mitochondrial MnSOD                         | TCTCCGCAAGATTATGGAGC / TTGGCGTCATTCTTGGCCT       |
| <i>sod4</i>                                                           | BBA_04317  | Mitochondrial FeSOD                         | CGAGATGGTCTTACGGCTTCAG / GCTCCAGGTGTTGAGGCATAG   |
| <i>sod5</i>                                                           | BBA_01984  | Cell wall-anchored Cu/ZnSOD                 | CGGCGACCTCAGCGCAAGTAC / GCCAGCAACAACAGGGACCGTAGG |
| <b>Involved in cell wall composition and signaling</b>                |            |                                             |                                                  |
| <i>bck1</i>                                                           | BBA_01318  | MAP kinase kinase kinase Bck1               | TAGGGACTGGATTGGCATC / CTGCAGCAGAACTACGCTTG       |
| <i>mkk1</i>                                                           | BBA_01095  | MAP kinase kinase 1 Mkk1                    | GGTGAAGCCAACACCTTCAT / GCAAGTCAATCAGACCAGCA      |
| <i>slt2</i>                                                           | BBA_03334  | MAP kinase Slt2                             | TCGACAAGATGCTGGCCTTT / ATGTGCAGGTAAGGGTGCTC      |
| <i>smi1</i>                                                           | BBA_06704  | SMI1/KNR4 family protein                    | ACCGACATTCTCGTTTGAC / AAGAGCTGTTGGGAGTGGA        |
| <i>fks1</i>                                                           | BBA_10207  | Beta-1,3-glucan synthase catalytic subunit  | GAGCCAGTCGAGGAGTTTAC / TCGGGGTACCAGAAAAGTTG      |
| <i>chs1</i>                                                           | BBA_03793  | Chitin synthase chaperone-like protein Chs7 | GAATCGAGCCCTCATGCTAC / TCAACAACGAGCGAGAAGAA      |
| <i>chs2</i>                                                           | BBA_02360  | BRCA1 C Terminus domain-containing protein  | TAGACGCCTGCGAGAAGAAT / AATCACGCTCTCATCTCGT       |
| <i>chs3</i>                                                           | BBA_07346  | Class VII chitin synthase                   | GCTCTGTCAAGGTGCTTTCC / GAGGTTGTGGTGACGAGTT       |
| <i>chs4</i>                                                           | BBA_06845  | MIF4G domain-containing protein             | GATGGCAATCGATTTTGCT / TCAACAAGACCCTTGGGAAC       |
| <i>chs5</i>                                                           | BBA_06859  | Class V chitin synthase                     | CTGGTGAGAAGGGCAAGAAG / GCATAGCTGTAGCCCAGAGAC     |
| <i>chs6</i>                                                           | BBA_04667  | Chitin synthase 3a                          | AGGGCTCTGTCTTTCCATT / CGCAAATCGTAACCGTTTTT       |
| <i>Chs7</i>                                                           | BBA_03590  | Chitin synthase 1                           | GCCAAAGACTTGCTCGGTAG / GGCGGCGAACATAAGATAAA      |
| <i>chs8</i>                                                           | BBA_08396  | Glycosyltransferase family 2                | TTCAAGAAGCTGCCCCACCT / CAGCGGAGCTAAAGGAAATG      |
| <i>chs9</i>                                                           | BBA_03236  | Class 2 chitin synthase                     | TCCCTTGCCAGATGATTTTC / ATCAAAGGCCTTCAAAGGT       |
| <b>Involved in HOG signal pathway regulating osmotic response</b>     |            |                                             |                                                  |
| <i>sskB</i>                                                           | BBA_00937  | MAP kinase kinase kinase SskB               | GCTCACCACATTTAGCGAA / TGCAGACCGTCTTCTTCAT        |
| <i>pbs2</i>                                                           | BBA_02330  | MAP kinase kinase Pbs2                      | GCAGAAAAGGGGTGGATCAC / GTGTGCCGAACCTTGTAGAC      |
| <i>hog1</i>                                                           | BBA_05209  | MAP kinase Hog1                             | CCTTCACAGACTCCTCACGT / GTGTGCCGAACCTTGTAGAC      |

\* Gene accession codes of *B. bassiana* genome under the NCBI accession NL\_ADAH00000000.

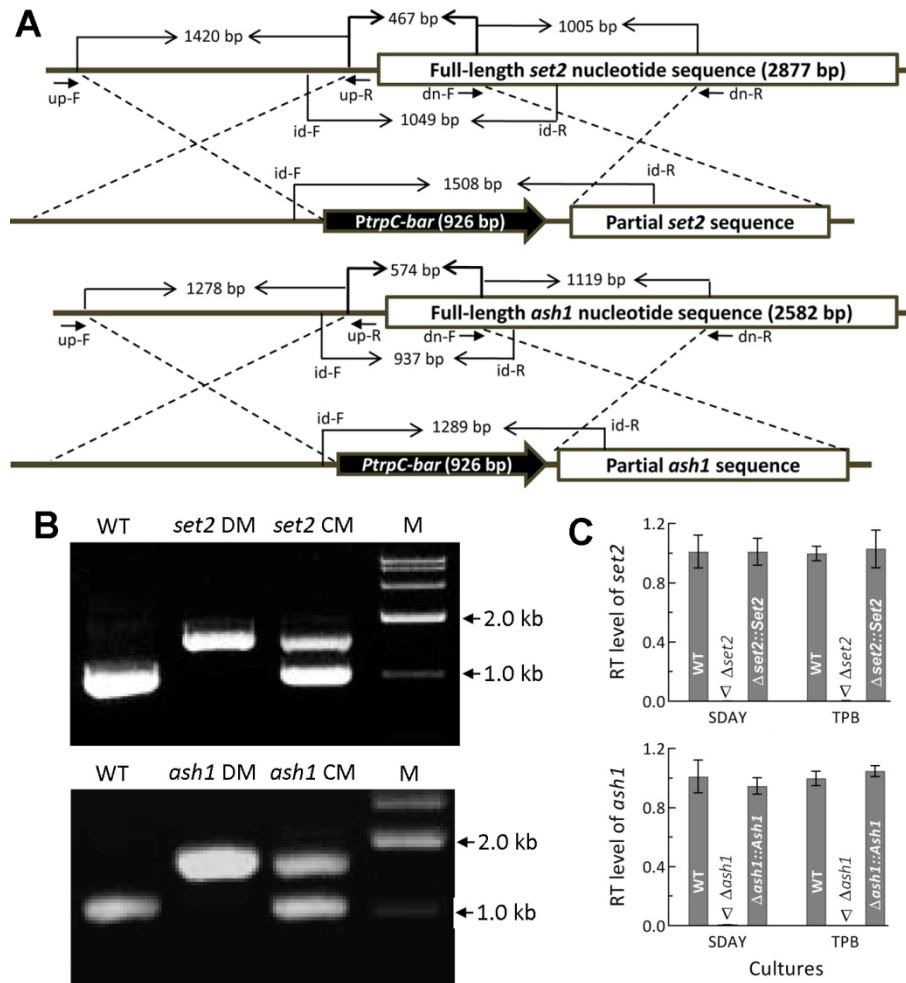

**Figure S1.** Generation and identification of *set2* and *ash1* mutants in *B. bassiana*. **(A)** Schematic diagrams for the disruption strategy of *set2* and *ash1*. **(B)** The *set2* and *ash1* mutants identified through PCR analysis with paired primers (Table S1). WT, wild-type DNA. DM, DNA of disruption mutant; CM, DNA of complementation mutant. M, molecular ladder of DNA. Detected PCR bands are the fragments of 1508 bp for deleted *set2* and 1049 bp for WT, of 1289 bp for deleted *ash1* and 937 bp for WT, and of both for CM, leading to the disruption of *set2* or *ash1* by deleting a partial promoter/coding fragment of 467 bp ( $1049 + 926 - 1508 = 467$  bp) or 574 bp ( $937 + 926 - 1289 = 574$  bp) as expected in the diagrams. **(C)** Relative transcript (RT) levels of *set2* and *ash1* in the 3-day-old SDAY and TPB cultures of the mutants with respect to the WT standard. Note that the expression of each target gene was completely abolished in DM and well restored in CM. Error bars: standard deviations of the means for three cDNA samples derived from the independent SDAY or TPB cultures and analyzed via qPCR with paired primers (Table S1).

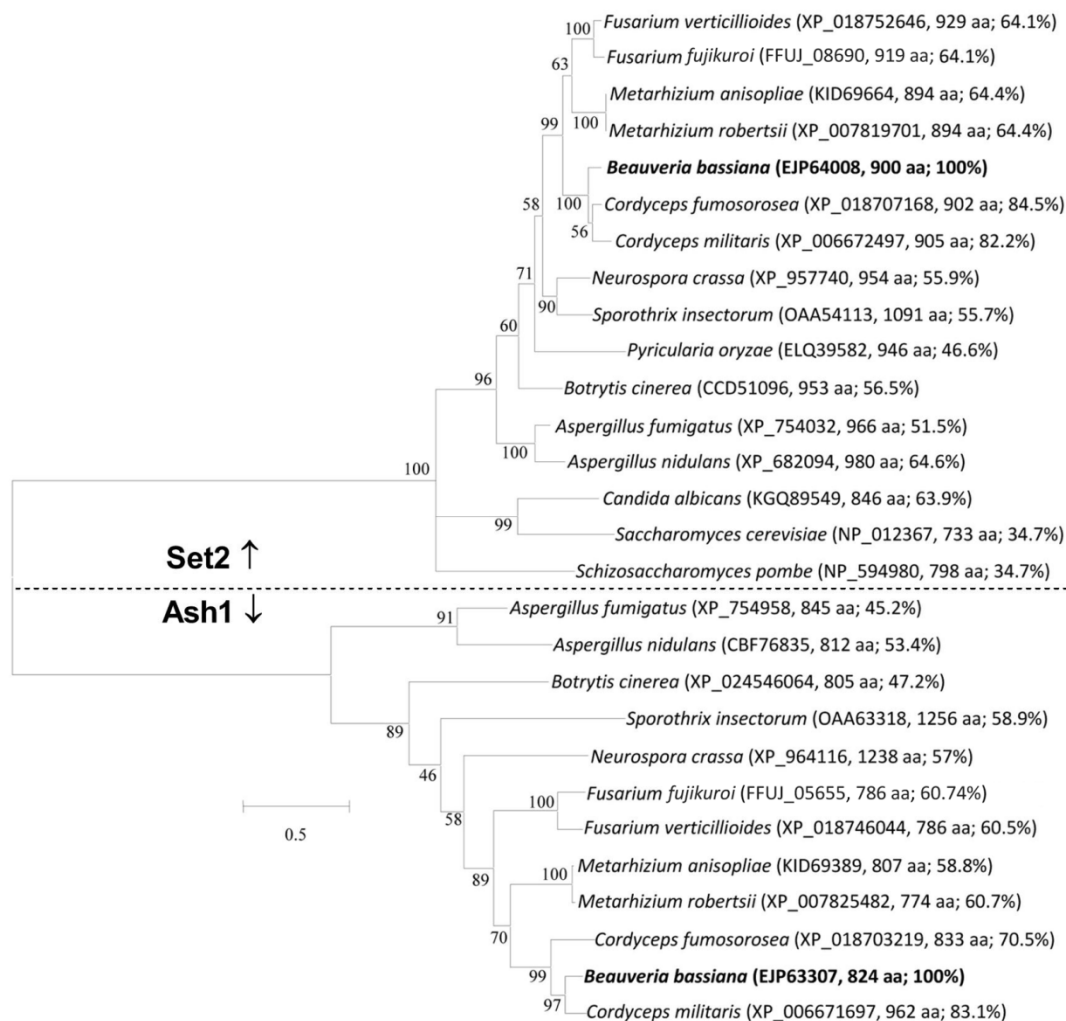

**Figure S2.** Phylogenetic analysis of ascomycetous Set2 and Ash1 homologs. The tree is constructed with the maximum likelihood method in MEGA7 at <http://www.megasoftware.net/>. Bootstrap values of 1000 replications are shown at nodes. Scale: branch length proportional to genetic distance. For each fungus, the NCBI accession code of each homolog, the length of its amino acid sequence, and its protein sequence identity to the homolog of *B. bassiana* are given in the parentheses following the fungal name.
